# Supplementary material for: Childhood Body Size and the Risk of Malignant Melanoma in Adulthood
Source: PubMed Central journal article supplement — Am J Epidemiol. 2017 Mar 22;185(8):673–80. doi: 10.1093/aje/kww128 (PMC5394246; doi:10.1093/aje/kww128), 2017-03-22
Supplement: kww128bakerwebmaterialfinal.pdf [file kww128bakerwebmaterialfinal.pdf]

## Web Material

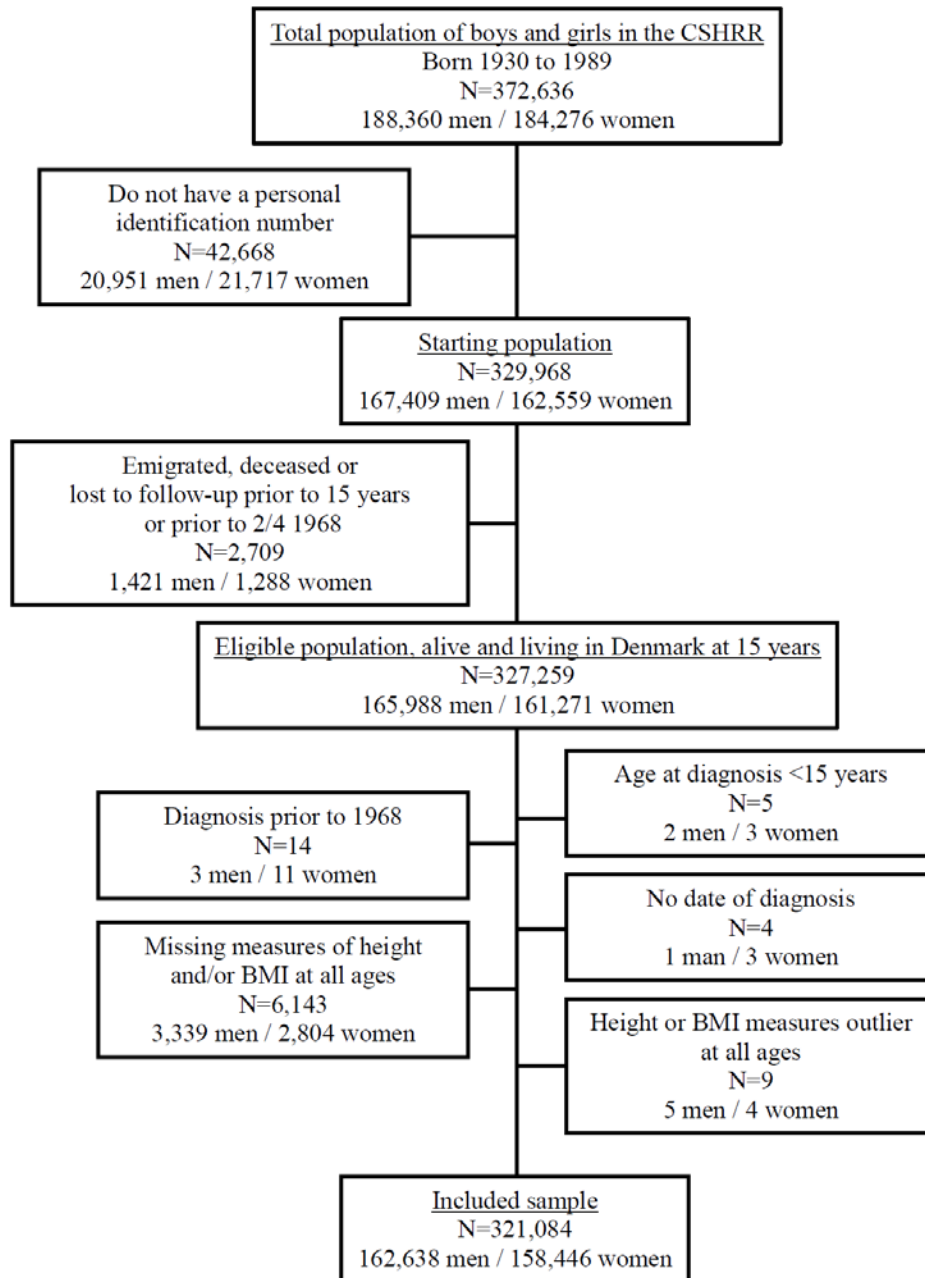

**Web Figure 1.** Flowchart describing the criteria of eligibility in the overall study (N=321,084), based on data from the Copenhagen School Health Records Register, Copenhagen 1968-2012. Abbreviations: BMI, body mass index.

The flowchart differs from previously published data (Kitahara CM, Gamborg M, Berrington de González A, et al. Childhood height and body mass index were associated with risk of adult thyroid cancer in a large cohort study. *Cancer Res.* 2014; 74(1):235-242) as 19 individuals have changed status in the period from 2010 to 2012.

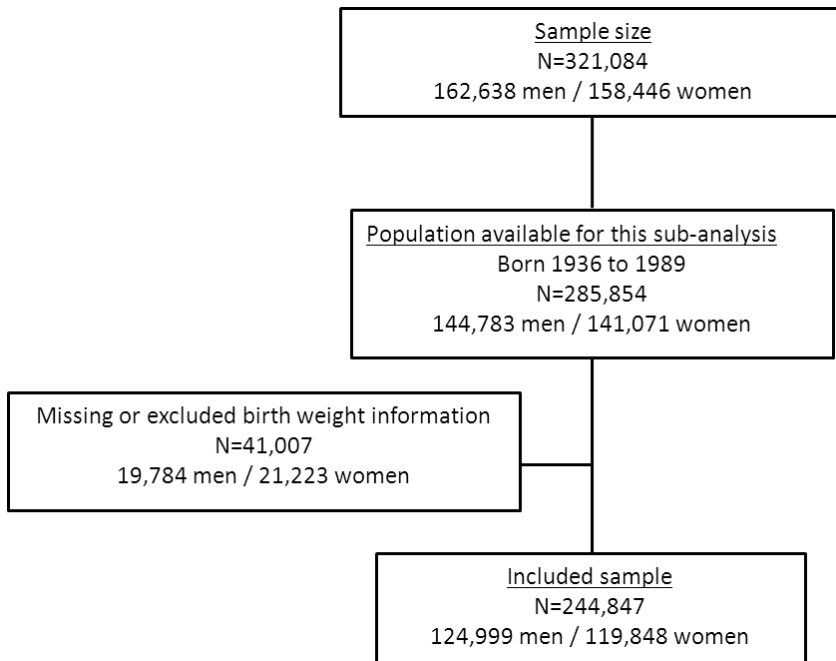

**Web Figure 2.** Flowchart describing the criteria of eligibility in the sub-analysis of birth weight, based on data from the Copenhagen School Health Records Register, Copenhagen, Denmark, 1968-2012.

**Web Table 1.** Sex-specific Risk of Adult Malignant Melanoma per Z-score of Childhood Height and Height Adjusted for BMI, Based on Data From the Copenhagen School Health Records Register, Copenhagen, Denmark, 1968-2012

| <b>Height<sup>a</sup></b>                                       | <b>Men</b>       |           |               | <b>Women</b>     |           |               | <b>P value sex interaction<sup>b</sup></b> |
|-----------------------------------------------------------------|------------------|-----------|---------------|------------------|-----------|---------------|--------------------------------------------|
| <b>Age (years)</b>                                              | <b>Cases (N)</b> | <b>HR</b> | <b>95% CI</b> | <b>Cases (N)</b> | <b>HR</b> | <b>95% CI</b> |                                            |
| 7                                                               | 993              | 1.20      | 1.12, 1.28    | 1,201            | 1.22      | 1.15, 1.29    | 0.72                                       |
| 8                                                               | 1,013            | 1.20      | 1.13, 1.28    | 1,214            | 1.24      | 1.17, 1.31    | 0.50                                       |
| 9                                                               | 1,004            | 1.22      | 1.14, 1.30    | 1,203            | 1.24      | 1.17, 1.31    | 0.72                                       |
| 10                                                              | 996              | 1.21      | 1.14, 1.29    | 1,180            | 1.22      | 1.15, 1.29    | 0.88                                       |
| 11                                                              | 997              | 1.22      | 1.14, 1.30    | 1,181            | 1.21      | 1.15, 1.29    | 0.93                                       |
| 12                                                              | 981              | 1.22      | 1.14, 1.30    | 1,183            | 1.20      | 1.13, 1.27    | 0.70                                       |
| 13                                                              | 967              | 1.20      | 1.13, 1.28    | 1,177            | 1.20      | 1.13, 1.27    | 0.89                                       |
| <b>Height adjusted for BMI (kg/m<sup>2</sup>)<sup>a,c</sup></b> | <b>Men</b>       |           |               | <b>Women</b>     |           |               | <b>P value sex interaction<sup>b</sup></b> |
| <b>Age (years)</b>                                              | <b>Cases (N)</b> | <b>HR</b> | <b>95% CI</b> | <b>Cases (N)</b> | <b>HR</b> | <b>95% CI</b> |                                            |
| 7                                                               | 993              | 1.19      | 1.12, 1.27    | 1,201            | 1.22      | 1.15, 1.29    | 0.73                                       |
| 8                                                               | 1,013            | 1.19      | 1.12, 1.27    | 1,214            | 1.25      | 1.18, 1.32    | 0.50                                       |
| 9                                                               | 1,004            | 1.21      | 1.13, 1.29    | 1,203            | 1.24      | 1.17, 1.32    | 0.72                                       |
| 10                                                              | 996              | 1.20      | 1.13, 1.28    | 1,180            | 1.24      | 1.16, 1.31    | 0.88                                       |
| 11                                                              | 997              | 1.21      | 1.14, 1.29    | 1,181            | 1.23      | 1.16, 1.31    | 0.95                                       |
| 12                                                              | 981              | 1.21      | 1.13, 1.29    | 1,183            | 1.22      | 1.15, 1.29    | 0.71                                       |
| 13                                                              | 967              | 1.20      | 1.12, 1.29    | 1,177            | 1.22      | 1.15, 1.29    | 0.86                                       |

Abbreviations: BMI, body mass index; CI, confidence interval; HR, hazard ratio.

<sup>a</sup> All analyses are stratified by 5-year birth cohorts.

<sup>b</sup> P value <0.05 indicates a sex interaction.

<sup>c</sup> BMI given as kg/m<sup>2</sup>.

**Web Table 2.** Sex-specific Risk of Adult Malignant Melanoma per Z-score of Childhood BMI and BMI Adjusted for Height, Based on Data From the Copenhagen School Health Records Register, Copenhagen, Denmark, 1968-2012

| <b>BMI (kg/m<sup>2</sup>)<sup>a,c</sup></b>  |                  | <b>Men</b> |               | <b>Women</b>     |           | <b>P value sex interaction<sup>b</sup></b> |               |
|----------------------------------------------|------------------|------------|---------------|------------------|-----------|--------------------------------------------|---------------|
| <b>Age (years)</b>                           | <b>Cases (N)</b> | <b>HR</b>  | <b>95% CI</b> | <b>Cases (N)</b> | <b>HR</b> |                                            | <b>95% CI</b> |
| 7                                            | 993              | 1.07       | 1.00, 1.15    | 1,201            | 1.02      | 0.96, 1.09                                 | 0.33          |
| 8                                            | 1,013            | 1.09       | 1.01, 1.17    | 1,214            | 1.02      | 0.96, 1.09                                 | 0.22          |
| 9                                            | 1,004            | 1.08       | 1.00, 1.16    | 1,203            | 1.02      | 0.96, 1.09                                 | 0.26          |
| 10                                           | 996              | 1.09       | 1.02, 1.17    | 1,180            | 1.01      | 0.95, 1.07                                 | 0.10          |
| 11                                           | 997              | 1.08       | 1.00, 1.16    | 1,181            | 0.99      | 0.93, 1.06                                 | 0.11          |
| 12                                           | 981              | 1.08       | 1.00, 1.16    | 1,183            | 0.99      | 0.93, 1.06                                 | 0.09          |
| 13                                           | 967              | 1.07       | 1.00, 1.15    | 1,177            | 0.97      | 0.92, 1.04                                 | 0.05          |
| <b>BMI adjusted for height<sup>a,c</sup></b> |                  | <b>Men</b> |               | <b>Women</b>     |           | <b>P value sex interaction<sup>b</sup></b> |               |
| <b>Age (years)</b>                           | <b>Cases (N)</b> | <b>HR</b>  | <b>95% CI</b> | <b>Cases (N)</b> | <b>HR</b> |                                            | <b>95% CI</b> |
| 7                                            | 993              | 1.04       | 0.97, 1.11    | 1,201            | 0.98      | 0.92, 1.04                                 | 0.26          |
| 8                                            | 1,013            | 1.05       | 0.97, 1.12    | 1,214            | 0.97      | 0.91, 1.04                                 | 0.18          |
| 9                                            | 1,004            | 1.03       | 0.96, 1.11    | 1,203            | 0.97      | 0.91, 1.03                                 | 0.23          |
| 10                                           | 996              | 1.04       | 0.97, 1.12    | 1,180            | 0.95      | 0.89, 1.02                                 | 0.09          |
| 11                                           | 997              | 1.02       | 0.95, 1.10    | 1,181            | 0.93      | 0.87, 1.00                                 | 0.08          |
| 12                                           | 981              | 1.02       | 0.95, 1.10    | 1,183            | 0.93      | 0.87, 0.99                                 | 0.07          |
| 13                                           | 967              | 1.00       | 0.93, 1.08    | 1,177            | 0.92      | 0.86, 0.98                                 | 0.09          |

Abbreviations: BMI, body mass index; CI, confidence interval; HR, hazard ratio.

<sup>a</sup> All analyses are stratified by 5-year birth cohorts.

<sup>b</sup> *P* value <0.05 indicates a sex interaction.

<sup>c</sup> BMI given as kg/m<sup>2</sup>.

**Web Table 3.** Sex-specific Risk of Adult Malignant Melanoma per Z-score of Childhood BSA and BSA Adjusted for Height, Based on Data From the Copenhagen School Health Records Register, Copenhagen, Denmark, 1968-2012

| <b>BSA (m<sup>2</sup>)<sup>a,c</sup></b>     |                  | <b>Men</b> |               | <b>Women</b>     |           | <b>P value sex interaction<sup>b</sup></b> |               |
|----------------------------------------------|------------------|------------|---------------|------------------|-----------|--------------------------------------------|---------------|
| <b>Age (years)</b>                           | <b>Cases (N)</b> | <b>HR</b>  | <b>95% CI</b> | <b>Cases (N)</b> | <b>HR</b> |                                            | <b>95% CI</b> |
| 7                                            | 993              | 1.20       | 1.13, 1.29    | 1,201            | 1.18      | 1.11, 1.25                                 | 0.65          |
| 8                                            | 1,013            | 1.21       | 1.13, 1.29    | 1,214            | 1.19      | 1.12, 1.26                                 | 0.72          |
| 9                                            | 1,004            | 1.21       | 1.13, 1.30    | 1,203            | 1.18      | 1.11, 1.25                                 | 0.53          |
| 10                                           | 996              | 1.21       | 1.14, 1.30    | 1,180            | 1.16      | 1.09, 1.23                                 | 0.29          |
| 11                                           | 997              | 1.21       | 1.13, 1.29    | 1,181            | 1.14      | 1.08, 1.21                                 | 0.23          |
| 12                                           | 981              | 1.20       | 1.12, 1.29    | 1,183            | 1.12      | 1.06, 1.19                                 | 0.14          |
| 13                                           | 967              | 1.19       | 1.11, 1.27    | 1,177            | 1.10      | 1.04, 1.17                                 | 0.11          |
| <b>BSA adjusted for height<sup>a,c</sup></b> |                  | <b>Men</b> |               | <b>Women</b>     |           | <b>P value sex interaction<sup>b</sup></b> |               |
| <b>Age (years)</b>                           | <b>Cases (N)</b> | <b>HR</b>  | <b>95% CI</b> | <b>Cases (N)</b> | <b>HR</b> |                                            | <b>95% CI</b> |
| 7                                            | 993              | 1.08       | 0.95, 1.24    | 1,201            | 0.97      | 0.87, 1.09                                 | 0.75          |
| 8                                            | 1,013            | 1.09       | 0.96, 1.24    | 1,214            | 0.96      | 0.86, 1.07                                 | 0.85          |
| 9                                            | 1,004            | 1.06       | 0.93, 1.21    | 1,203            | 0.95      | 0.85, 1.05                                 | 0.67          |
| 10                                           | 996              | 1.07       | 0.95, 1.22    | 1,180            | 0.92      | 0.83, 1.03                                 | 0.38          |
| 11                                           | 997              | 1.04       | 0.92, 1.18    | 1,181            | 0.90      | 0.81, 1.00                                 | 0.29          |
| 12                                           | 981              | 1.04       | 0.91, 1.17    | 1,183            | 0.88      | 0.79, 0.98                                 | 0.17          |
| 13                                           | 967              | 1.02       | 0.89, 1.16    | 1,177            | 0.88      | 0.80, 0.97                                 | 0.26          |

Abbreviations: BSA, body surface area; CI, confidence interval; HR, hazard ratio.

<sup>a</sup> All analyses are stratified by 5-year birth cohorts.

<sup>b</sup> P value <0.05 indicates a sex interaction.

<sup>c</sup> BSA given as  $\text{weight (kg)}^{0.5378} \times \text{height (cm)}^{0.3964} \times 0.024265$ .

**Web Table 4.** Sex-specific Risk of Adult Malignant Melanoma per Kilogram of Birth Weight, Based on Data From the Copenhagen School Health Records Register, Copenhagen, Denmark, 1968-2012

| Cases (N) | Men <sup>a</sup> |            | Women <sup>a</sup> |      |            | <i>P</i> value sex interaction <sup>b</sup> |
|-----------|------------------|------------|--------------------|------|------------|---------------------------------------------|
|           | HR               | 95% CI     | Cases (N)          | HR   | 95% CI     |                                             |
| 755       | 1.19             | 1.05, 1.35 | 927                | 1.07 | 0.95, 1.21 | 0.25                                        |

Abbreviations: CI, confidence interval; HR, hazard ratio.

<sup>a</sup> All analyses are stratified by 5-year birth cohorts.

<sup>b</sup> *P* value <0.05 indicates a sex interaction.

**Web Table 5.** HRs and 95% CIs for the Risk of Malignant Melanoma per Height Z-score in Childhood and Height Adjusted for BMI or BSA, Based on Data From the Copenhagen School Health Records Register, Copenhagen, Denmark, 1968-2012

| Age (years) | N       | Cases ( N) | Height <sup>a</sup> |            | Height adjusted for BMI <sup>a,b</sup> |            | Height adjusted for BSA <sup>a,c</sup> |            |
|-------------|---------|------------|---------------------|------------|----------------------------------------|------------|----------------------------------------|------------|
|             |         |            | HR                  | 95% CI     | HR                                     | 95% CI     | HR                                     | 95% CI     |
| 7           | 299,891 | 2,194      | 1.21                | 1.16, 1.26 | 1.21                                   | 1.16, 1.26 | 1.19                                   | 1.10, 1.29 |
| 8           | 303,519 | 2,227      | 1.22                | 1.17, 1.28 | 1.22                                   | 1.17, 1.28 | 1.21                                   | 1.12, 1.31 |
| 9           | 292,652 | 2,207      | 1.23                | 1.18, 1.28 | 1.23                                   | 1.18, 1.28 | 1.23                                   | 1.14, 1.33 |
| 10          | 285,093 | 2,176      | 1.22                | 1.17, 1.27 | 1.22                                   | 1.17, 1.28 | 1.23                                   | 1.14, 1.33 |
| 11          | 283,049 | 2,178      | 1.22                | 1.17, 1.27 | 1.22                                   | 1.17, 1.28 | 1.26                                   | 1.17, 1.36 |
| 12          | 280,523 | 2,164      | 1.20                | 1.15, 1.26 | 1.21                                   | 1.16, 1.27 | 1.26                                   | 1.17, 1.36 |
| 13          | 276,020 | 2,144      | 1.20                | 1.15, 1.25 | 1.21                                   | 1.16, 1.27 | 1.27                                   | 1.18, 1.37 |

Abbreviations: BMI, body mass index; BSA, body surface area; CI, confidence interval; HR, hazard ratio.

<sup>a</sup> All analyses are stratified by sex and 5-year birth cohorts.

<sup>b</sup> BMI given as kg/m<sup>2</sup>.

<sup>c</sup> BSA given as weight (kg)<sup>0.5378</sup> × height (cm)<sup>0.3964</sup> × 0.024265.
